# Supplementary material for: Basmisanil, a highly selective GABAA-α5 negative allosteric modulator: preclinical pharmacology and demonstration of functional target engagement in man
Source: PubMed Central journal article supplement (PMC8032764; doi:10.1038/s41598-021-87307-7), 2021-04-08
Supplement: 41598_2021_87307_MOESM1_ESM.pdf [file 41598_2021_87307_MOESM1_ESM.pdf]

## Supplementary Information

### **Basmisaniil, a Highly Selective GABA<sub>A</sub>- $\alpha$ 5 Receptor Negative Allosteric Modulator: Preclinical Pharmacology and Demonstration of Functional Target Engagement in Man**

Joerg F Hipp<sup>1</sup>, Frederic Knoflach<sup>1</sup>, Robert Comley<sup>1</sup>, Theresa M. Ballard<sup>1</sup>, Michael Honer<sup>1</sup>, Gerhard Trube<sup>1</sup>, Rodolfo Gasser<sup>2</sup>, Eric Prinssen<sup>1</sup>, Tanya L. Wallace<sup>5</sup>, Andreas Rothfuss<sup>2</sup>, Henner Knust<sup>3</sup>, Sian Lennon-Chrimes<sup>4</sup>, Michael Derks<sup>4</sup>, Lisa Squassante<sup>4</sup>, Stephane Nave<sup>1</sup>, Jana Nöldeke<sup>1</sup>, Christoph Wandel<sup>2</sup>, Andrew W Thomas<sup>3</sup>, Maria-Clemencia Hernandez<sup>1</sup>

\*Corresponding author: [maria-clemencia.hernandez@roche.com](mailto:maria-clemencia.hernandez@roche.com)

#### **Table of contents**

| <b>Page</b> | <b>Item</b>      | <b>Content</b>                                                                                                                                                                                                    |
|-------------|------------------|-------------------------------------------------------------------------------------------------------------------------------------------------------------------------------------------------------------------|
| 3           | <b>Figure S1</b> | Pharmacokinetic profile of basmisaniil in cynomolgus macaque and Wistar rat.                                                                                                                                      |
| 4           | <b>Figure S2</b> | Effect of diazepam alone and following pre-treatment with basmisaniil during the six learning trials of acutely treated rats in the Morris water maze.                                                            |
| 5           | <b>Figure S3</b> | Basmisaniil does not impair prepulse inhibition induced by different prepulse intensities (72, 76, 80, 84 dB).                                                                                                    |
| 6           | <b>Figure S4</b> | Plasma exposures achieved with basmisaniil in the rat PTZ test and in GLP toxicological studies in rats and dogs compared with plasma exposure required for full GABA <sub>A</sub> $\alpha$ 5 receptor occupancy. |
| 7           | <b>Figure S5</b> | Electrophysiological signatures of midazolam and basmisaniil.                                                                                                                                                     |
| 9           | <b>Table S1</b>  | Restriction enzyme sites used to linearize the different GABA <sub>A</sub> receptor subunit cDNAs cloned into the pcDNA3.1 vectors.                                                                               |
| 10          | <b>Table S2</b>  | Selectivity profile of basmisaniil.                                                                                                                                                                               |

|    |                             |                                                                                                     |
|----|-----------------------------|-----------------------------------------------------------------------------------------------------|
| 13 | <b>Table S3</b>             | Summary of mean pharmacokinetic parameters of basmisanil following single intravenous dosing.       |
| 13 | <b>Table S4</b>             | Summary of the in vitro profile of GABA <sub>A</sub> α5 receptor NAMs                               |
| 14 | <b>Table S5</b>             | Basmisanil doses, plasma concentrations and regional receptor occupancy values in human PET studies |
| 15 | <b>Table S6</b>             | Summary of demographic characteristics of healthy volunteers in PET study                           |
| 15 | <b>Table S7</b>             | Summary of demographic characteristics of healthy volunteers in EEG study                           |
| 16 | <b>Clinical information</b> | Safety EEG data from Phase I studies in healthy volunteers                                          |

**a**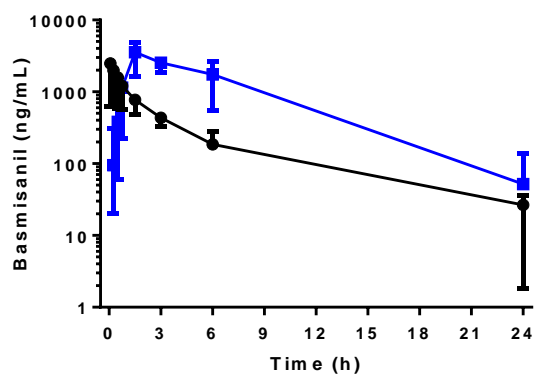**b**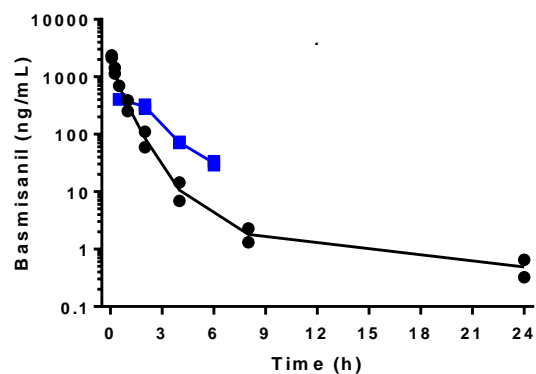

**Figure S1.** Pharmacokinetic profile of basmisanil in cynomolgus macaque and Wistar rat. (a) Pharmacokinetic profile of basmisanil in cynomolgus macaques after 1 mg/kg i.v. (blue line) and 10 mg/kg p.o. administration (black line). (b) Pharmacokinetic profile of basmisanil in male Wistar rats after 4.3 mg/kg i.v. (blue line) and 9 mg/kg p.o. administration (black line). Data are mean  $\pm$  S.D.; n = 2–3 per species and route.

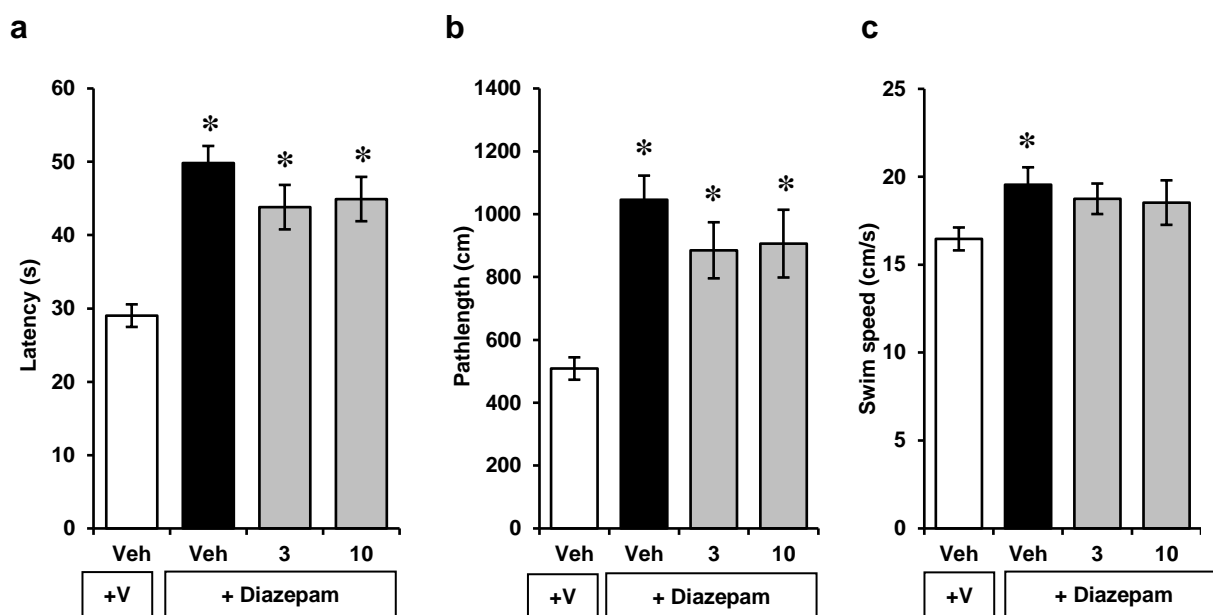

**Figure S2.** Effect of diazepam alone and following pre-treatment with basmisanil during the six learning trials of acutely treated rats in the Morris water maze. (a) latency (s) to find platform position; (b) pathlength (cm) travelled to find platform position; (c) swim speed (cm/s). Abscissa labels: Veh or V = vehicle, Diazepam at 6 mg/kg i.p., 3 = 3 mg/kg p.o. basmisanil, 10 = 10 mg/kg p.o. basmisanil. Compounds were administered 30 min before the test. Bars indicate mean of 6 trials  $\pm$  S.E.M. Statistics: \*  $p < 0.05$  vs. vehicle-treated group; 10 male Lister hooded rats per dose group.

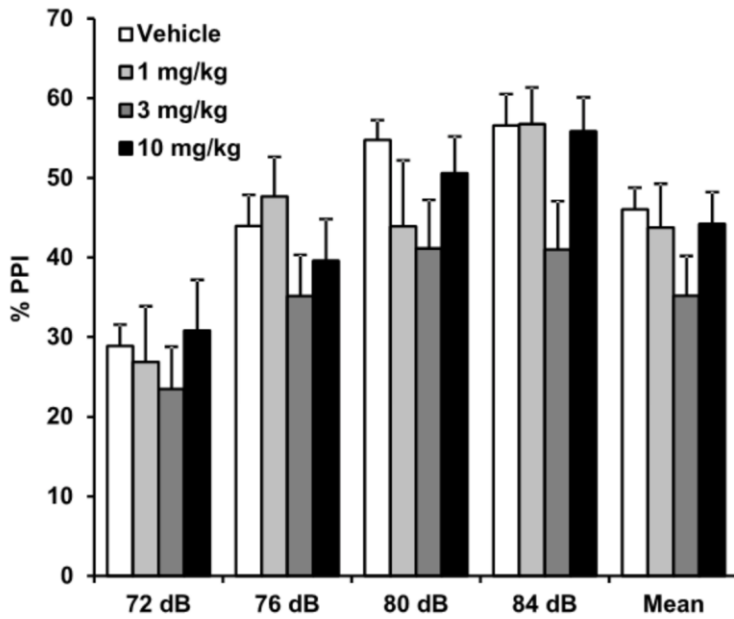

**Figure S3.** Basmisanil does not impair prepulse inhibition induced by different prepulse intensities (72, 76, 80, 84 dB) at total plasma concentrations of  $56 \pm 20$ ,  $169 \pm 20$ , and  $729 \pm 255$  ng/mL (mean  $\pm$  SD).

Compound administered at 1, 3 and 10 mg/kg p.o. to male Sprague-Dawley rats 30 min prior to testing. Bars indicate mean percent prepulse inhibition (% PPI)  $\pm$  SEM; 10 animals per dose group. Background noise: 68 dB. Startle pulse: 120 dB. For full methods refer to: Nordquist et al. (2008). Effects of aripiprazole/OPC-14597 on motor activity, pharmacological models of psychosis, and brain activity in rats. *Neuropharmacology*, 54,405-416.

Animals were euthanized at the end of testing and plasma samples were collected approximately 60 min post administration; n = 4 rats per group.

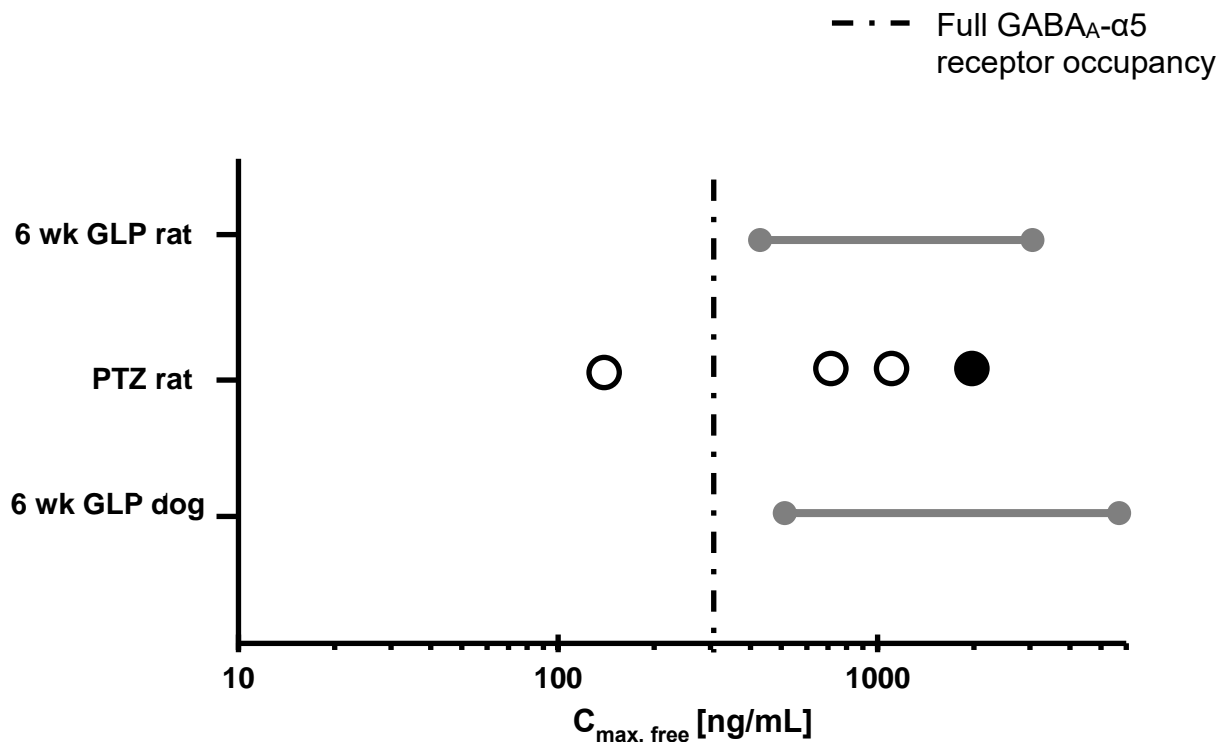

**Figure S4.** Plasma exposures achieved with basmisanil in the rat PTZ test and in GLP toxicological studies in rats and dogs compared with plasma exposure required for full  $GABA_A \alpha 5$  receptor occupancy (Rothuss et al., 2016; Wandel et al., 2015).

Grey lines: maximum free plasma concentration ( $C_{max, free}$ ) range covered in GLP toxicology studies. Open circles: plasma exposures with no pro-convulsant activity in PTZ test. Closed circle: pro-convulsant activity in 5/8 rats in PTZ test.

#### References:

Rothfuss A, Wandel C, Thomas A, Knoflach F, Trube G, Husar E, Gasser R, Schmitt M, Noeldeke J, Hernandez M-C. Basimisanil, a negative allosteric modulator of the gamma-aminobutyric acid  $A\alpha 5$  receptor subtype, does not show convulsions at relevant exposures. *The Toxicologist*. 2016;151.

Wandel C, Thomas A, Hernandez M-C, Ballard-Yardy T, Knoflach F, Trube G, Rothfuss A, Husar E, Lennon-Chrimes S, Bentley D, Liogier d'Ardhuy X, Squassante L, Noeldeke J, Khwaja O. RG1662, a new negative allosteric modulator of the gamma-aminobutyric acid  $A\alpha 5$  receptor subtype, does not show convulsions at relevant doses. *ECNP 2015*; P.1.g.041.

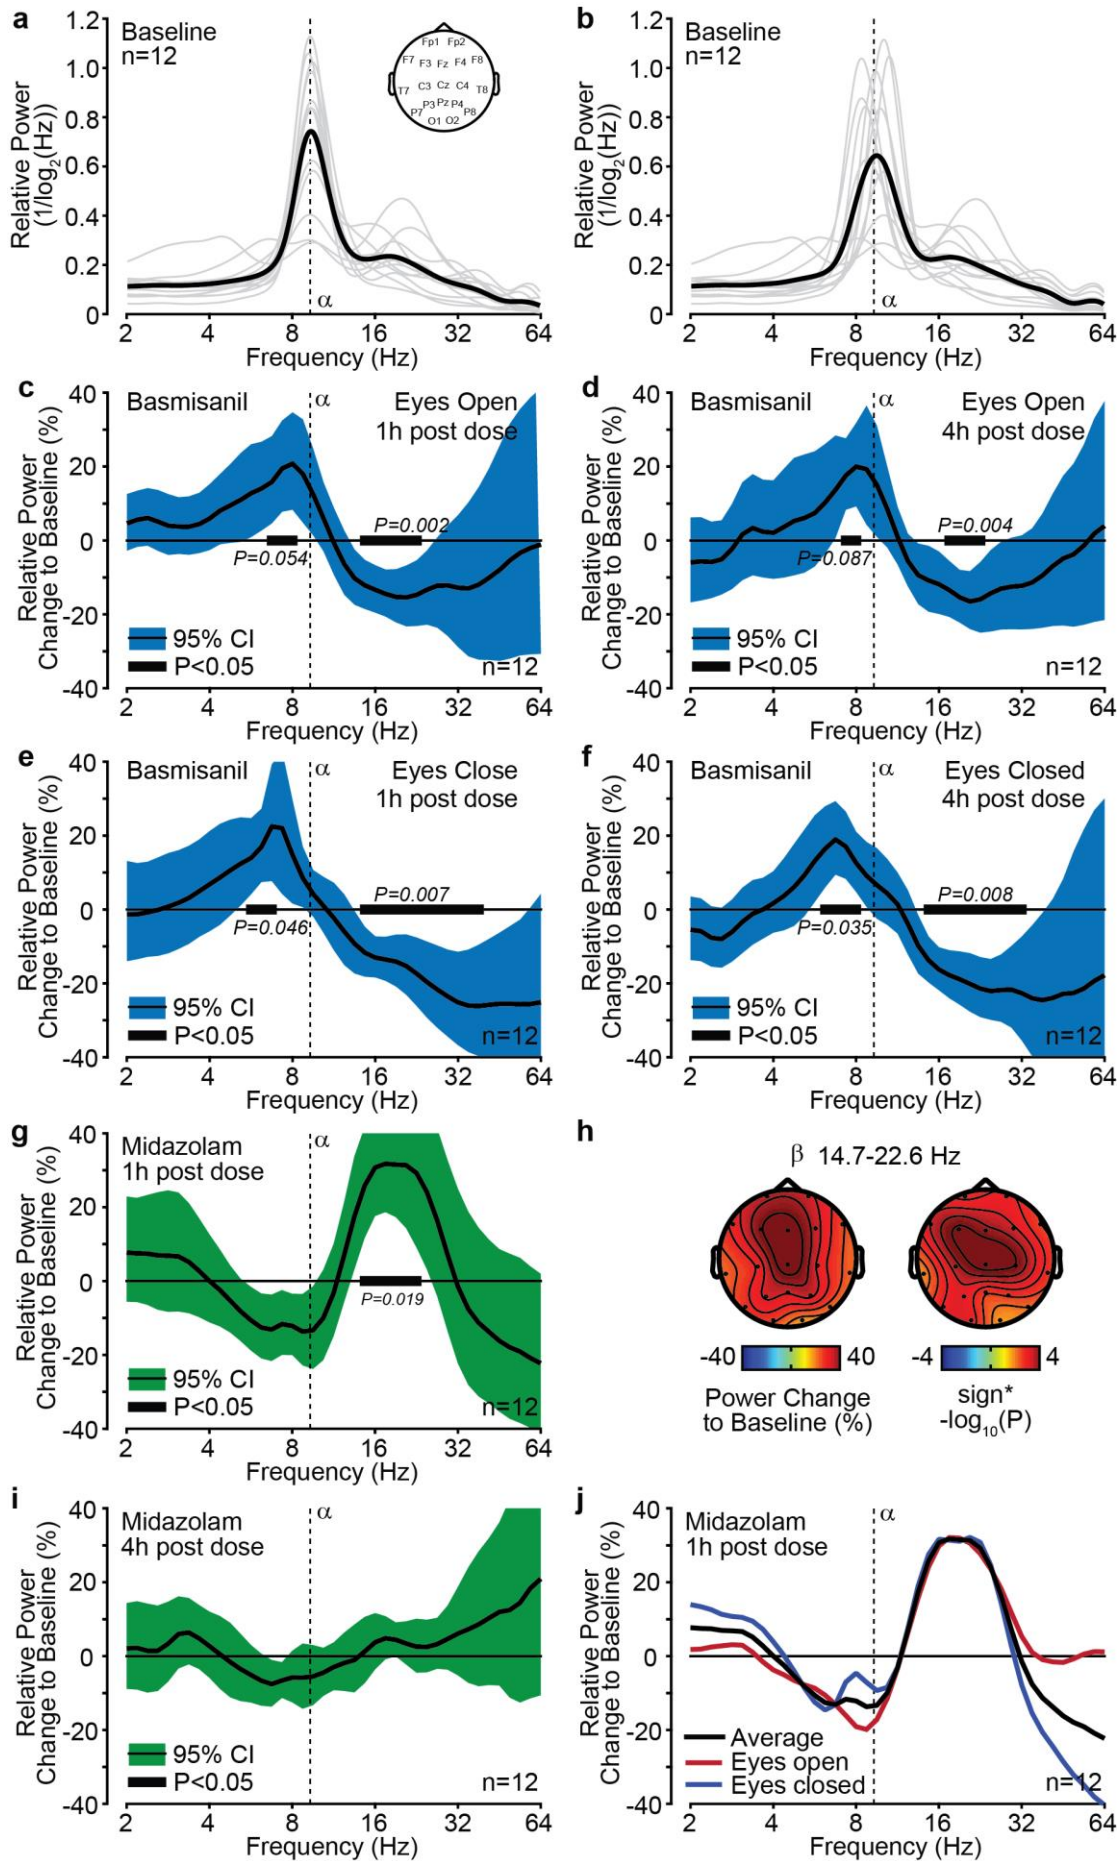

**Figure S5.** Electrophysiological signatures of midazolam and basmisanil.

(a) Baseline power spectrum, alpha peaks aligned (see methods). (b) Baseline power spectrum, alpha peaks not aligned. (c-f) Relative power change of EEG signals averaged across electrodes in response to basmisanil (eyes open or eyes closed conditions at 1 h or 4 h post morning dose after 14 days of 240 mg treatment twice daily). Black bars indicate significant effects for basmisanil (cluster randomization test). (g) Relative power change of EEG signals averaged across all electrodes in response to midazolam (1 h post a single 2 mg dose, average of eyes open and eyes closed). Black bar indicates significant effect (cluster randomization test) (h) Spatial distribution of power changes and p-values (derived from t-tests) for the significant cluster identified for Midazolam (14.7-22.6 Hz, black bar in g). Left: power changes, right: P-values. (i) Relative power change of EEG signals averaged across all electrodes in response to midazolam (4h post a single 2 mg dose, average of eyes open and eyes closed conditions). No significant effect (cluster randomization test). (j) Relative power change of EEG signals averaged across all electrodes in response to midazolam for eyes open and eyes closed conditions 1 h post a single 2 mg dose . CI = confidence interval (uncorrected for multiple testing across frequencies).



**Table S1.** Restriction enzyme sites used to linearize the different GABA<sub>A</sub> receptor subunit cDNAs cloned into the pcDNA3.1 vectors

| cDNA          | Vector       | Restriction site |
|---------------|--------------|------------------|
| GABRA1_HUMAN  | pcDNA 3.1(-) | Hind III         |
| GABRA2_HUMAN  | pcDNA 3.1(+) | Xba I            |
| GABRA3_HUMAN  | pcDNA 3.1(-) | Hind III         |
| GABRA5_HUMAN  | pcDNA 3.1(-) | Hind III         |
| GABRB2_HUMAN  | pcDNA 3.1(+) | XbaI             |
| GABRB3_HUMAN  | pcDNA 3.1(-) | NotI             |
| GABRG2_HUMAN  | pcDNA 3.1(+) | XbaI             |
| GABARAP_HUMAN | pcDNA 3.1(+) | NotI             |

**Table S2.** Selectivity profile of basmisanil.

**Source:** species (hum. = human) and tissue or cell line or recombinant (recomb.) receptors (cell line of expression in parentheses). **% Inhibition:** percentage inhibition of specific binding of the radioligand in presence of 10  $\mu$ M basmisanil. Mean values of n = 2. All experiments were done by Eurofins Cerep SA, Celle l'Evescault, France. For more information see the website, [www.neurofindiscoveryservices.com](http://www.neurofindiscoveryservices.com).

| Receptor                                            | Source                 | Ligand                                  | % Inhibition |
|-----------------------------------------------------|------------------------|-----------------------------------------|--------------|
| <b>Non-peptide receptors</b>                        |                        |                                         |              |
| Adenosine A <sub>1</sub>                            | hum. recomb. (CHO)     | [ <sup>3</sup> H]DPCPX                  | 28           |
| Adenosine A <sub>2A</sub>                           | hum. recomb. (HEK-293) | [ <sup>3</sup> H]CGS 21680              | 9            |
| Adenosine A <sub>3</sub>                            | hum. recomb. (HEK-293) | [ <sup>125</sup> I]AB-MECA              | 6            |
| Adrenergic $\alpha_1$ (non-selective)               | rat cerebral cortex    | [ <sup>3</sup> H]prazosin               | -1           |
| Adrenergic $\alpha_2$ (non-selective)               | rat cerebral cortex    | [ <sup>3</sup> H]RX 821002              | -8           |
| Adrenergic $\beta_1$                                | hum. recomb. (HEK-293) | [ <sup>3</sup> H](-)CGP 12177           | 6            |
| Adrenergic $\beta_2$                                | hum. recomb. (CHO)     | [ <sup>3</sup> H](-)CGP 12177           | 10           |
| Benzodiazepine (central)                            | rat cerebral cortex    | [ <sup>3</sup> H]flunitrazepam          | 76           |
| Benzodiazepine (peripheral)                         | rat heart              | [ <sup>3</sup> H]PK 11195               | -10          |
| Cannabinoid CB <sub>1</sub>                         | hum. recomb. (CHO)     | [ <sup>3</sup> H]CP 55940               | 16           |
| Dopamine D <sub>1</sub>                             | hum. recomb. (CHO)     | [ <sup>3</sup> H]SCH 23390              | 0            |
| Dopamine D <sub>2S</sub>                            | hum. recomb. (HEK-293) | [ <sup>3</sup> H]spiperone              | 9            |
| Dopamine D <sub>3</sub>                             | hum. recomb. (CHO)     | [ <sup>3</sup> H]spiperone              | 3            |
| Dopamine D <sub>4.4</sub>                           | hum. recomb. (CHO)     | [ <sup>3</sup> H]spiperone              | 9            |
| Dopamine D <sub>5</sub>                             | hum. recomb. (GH4)     | [ <sup>3</sup> H]SCH 23390              | -11          |
| GABA (non-selective)                                | rat cerebral cortex    | [ <sup>3</sup> H]GABA                   | -1           |
| Histamine H <sub>1</sub>                            | hum. recomb. (HEK-293) | [ <sup>3</sup> H]pyrilamine             | 10           |
| Histamine H <sub>2</sub>                            | hum. recomb. (CHO)     | [ <sup>125</sup> I]APT                  | 8            |
| Melatonin MT <sub>1</sub> (ML <sub>1A</sub> )       | hum. recomb. (CHO)     | [ <sup>125</sup> I]2-iodomelatonin      | 14           |
| Muscarinic M <sub>1</sub>                           | hum. recomb. (CHO)     | [ <sup>3</sup> H]pirenzepine            | 6            |
| Muscarinic M <sub>2</sub>                           | hum. recomb. (CHO)     | [ <sup>3</sup> H]AF-DX 384              | 13           |
| Muscarinic M <sub>3</sub>                           | hum. recomb. (CHO)     | [ <sup>3</sup> H]4-DAMP                 | 4            |
| Muscarinic M <sub>4</sub>                           | hum. recomb. (CHO)     | [ <sup>3</sup> H]4-DAMP                 | -4           |
| Muscarinic M <sub>5</sub>                           | hum. recomb. (CHO)     | [ <sup>3</sup> H]4-DAMP                 | -7           |
| Prostanoid EP <sub>4</sub>                          | hum. recomb. (CHO)     | [ <sup>3</sup> H]PGE <sub>2</sub>       | 3            |
| Prostanoid TP (TXA <sub>2</sub> /PGH <sub>2</sub> ) | hum. recomb. (HEK-293) | [ <sup>3</sup> H]SQ 29548               | 5            |
| Prostanoid IP (PGI <sub>2</sub> )                   | hum. recomb. (HEK-293) | [ <sup>3</sup> H]iloprost               | -1           |
| Purinergic P2X                                      | rat urinary bladder    | [ <sup>3</sup> H] $\alpha,\beta$ -MeATP | -7           |

**Table S2 - continued**

| <b>Receptor</b>                        | <b>Source</b>           | <b>Ligand</b>                                                  | <b>% Inhibition</b> |
|----------------------------------------|-------------------------|----------------------------------------------------------------|---------------------|
| Purinergic P2Y                         | rat cerebral cortex     | [ <sup>35</sup> S]dATPαS                                       | 9                   |
| Serotonin 5-HT <sub>1A</sub>           | hum. recomb. (HEK-293)  | [ <sup>3</sup> H]8-OH-DPAT                                     | 0                   |
| Serotonin 5-HT <sub>1B</sub>           | rat cerebral cortex     | [ <sup>125</sup> I]CYP                                         | 0                   |
| Serotonin 5-HT <sub>2A</sub>           | hum. recomb. (HEK-293)  | [ <sup>3</sup> H]ketanserin                                    | -9                  |
| Serotonin 5-HT <sub>2B</sub>           | hum. recomb. (CHO)      | [ <sup>125</sup> I](±)DOI                                      | 31                  |
| Serotonin 5-HT <sub>2C</sub>           | hum. recomb. (CHO)      | [ <sup>3</sup> H]mesulergine                                   | 10                  |
| Serotonin 5-HT <sub>3</sub>            | hum. recomb. (CHO)      | [ <sup>3</sup> H]BRL 43694                                     | 8                   |
| Serotonin 5-HT <sub>5a</sub>           | hum. recomb. (CHO)      | [ <sup>3</sup> H]LSD                                           | 5                   |
| Serotonin 5-HT <sub>6</sub>            | hum. recomb. (CHO)      | [ <sup>3</sup> H]LSD                                           | 7                   |
| Serotonin 5-HT <sub>7</sub>            | hum. recomb. (CHO)      | [ <sup>3</sup> H]LSD                                           | 13                  |
| Sigma σ (non-selective)                | rat cerebral cortex     | [ <sup>3</sup> H]DTG                                           | 58                  |
| <b>Peptide receptors</b>               |                         |                                                                |                     |
| Angiotensin AT <sub>1</sub>            | hum. recomb. (HEK-293)  | [ <sup>125</sup> I][Sar <sup>1</sup> ,Ile <sup>8</sup> ]-AT-II | 2                   |
| Angiotensin AT <sub>2</sub>            | hum. recomb. (CHO)      | [ <sup>125</sup> I]CGP 42112A                                  | -3                  |
| Bombesin (non-selective)               | rat cerebral cortex     | [ <sup>125</sup> I][Tyr <sup>4</sup> ]bombesin                 | -24                 |
| Bradykinin B <sub>2</sub>              | hum. recomb. (CHO)      | [ <sup>3</sup> H]bradykinin                                    | 14                  |
| Calcitonin gene related peptide (CGRP) | hum. recomb. (CHO)      | [ <sup>125</sup> I]hCGRPα                                      | -6                  |
| Cholecystokinin CCK <sub>1</sub>       | hum. recomb. (CHO)      | [ <sup>125</sup> I]CCK-8s                                      | 10                  |
| Cholecystokinin CCK <sub>2</sub>       | hum. recomb. (CHO)      | [ <sup>125</sup> I]CCK-8s                                      | -21                 |
| Endothelin ET <sub>A</sub>             | hum. recomb. (CHO)      | [ <sup>125</sup> I]endothelin-1                                | 8                   |
| Endothelin ET <sub>B</sub>             | hum. recomb. (CHO)      | [ <sup>125</sup> I]endothelin-1                                | -2                  |
| Galanin 1                              | hum. recomb. (HEK-293)  | [ <sup>125</sup> I]galanin                                     | 0                   |
| Galanin 2                              | hum. recomb. (CHO)      | [ <sup>125</sup> I]galanin                                     | -1                  |
| Platelet derived growth factor (PDGF)  | mouse, Balb/c 3T3 cells | [ <sup>125</sup> I]PDGF BB                                     | -17                 |
| Chemokine CXCR2 (IL-8B)                | hum. recomb. (HEK-293)  | [ <sup>125</sup> I]IL-8                                        | -3                  |
| Chemokine CCR1                         | hum. recomb. (HEK-293)  | [ <sup>125</sup> I]MIP-1a                                      | -2                  |
| Melanocortin MC <sub>4</sub>           | hum. recomb. (CHO)      | [ <sup>125</sup> I]NDP-α-MSH                                   | 9                   |
| Neurokinin NK <sub>1</sub>             | hum., U-373MG cells     | [ <sup>125</sup> I]BH-SP                                       | 37                  |
| Neurokinin NK <sub>2</sub>             | hum. recomb. (CHO)      | [ <sup>125</sup> I]NKA                                         | 7                   |
| Neurokinin NK <sub>3</sub>             | hum. recomb. (CHO)      | [ <sup>3</sup> H]SR 142801                                     | -9                  |
| Neuropeptide Y <sub>1</sub>            | hum., SK-N-MC cells     | [ <sup>125</sup> I]peptide YY                                  | 0                   |
| Neuropeptide Y <sub>2</sub>            | hum., KAN-TS cells      | [ <sup>125</sup> I]peptide YY                                  | 7                   |

**Table S2 - continued**

| <b>Receptor</b>                                                        | <b>Source</b>             | <b>Ligand</b>                                              | <b>% Inhibition</b> |
|------------------------------------------------------------------------|---------------------------|------------------------------------------------------------|---------------------|
| Neurotensin NTS <sub>1</sub> (NT <sub>1</sub> )                        | hum. recomb. (CHO)        | [ <sup>125</sup> I]Tyr <sup>3</sup> -<br>-neurotensin      | -6                  |
| Opioid δ <sub>2</sub>                                                  | hum. recomb. (CHO)        | [ <sup>3</sup> H]DADLE                                     | 8                   |
| Opioid κ                                                               | hum. recomb. (CHO)        | [ <sup>3</sup> H]U 69593                                   | 13                  |
| Opioid μ                                                               | hum. recomb. (HEK-293)    | [ <sup>3</sup> H]DAMGO                                     | 3                   |
| Nociceptin (ORL1)                                                      | hum. recomb. (HEK-293)    | [ <sup>3</sup> H]nociceptin                                | -4                  |
| Somatostatin (non-selective)                                           | mouse, AtT-20 cells       | [ <sup>125</sup> I]Tyr <sup>11</sup> -<br>-somatostatin-14 | 18                  |
| Vasoactive intestinal peptide<br>PAC <sub>1</sub> (PACAP)              | hum. recomb. (CHO)        | [ <sup>125</sup> I]PACAP <sub>1-27</sub>                   | -16                 |
| Vasoactive intestinal peptide<br>VPAC <sub>1</sub> (VIP <sub>1</sub> ) | hum. recomb. (CHO)        | [ <sup>125</sup> I]VIP                                     | 0                   |
| Vasopressin V <sub>1A</sub>                                            | hum. recomb. (CHO)        | [ <sup>3</sup> H]AVP                                       | 13                  |
| <b>Ion channels</b>                                                    |                           |                                                            |                     |
| Ca <sup>2+</sup> channel, L-type<br>(phenylalkylamine site)            | rat cerebral cortex       | [ <sup>3</sup> H](-)D 888                                  | -3                  |
| K <sub>v</sub> channel                                                 | rat cerebral cortex       | [ <sup>125</sup> I]α-dendrotoxin                           | -1                  |
| SK <sub>Ca</sub> channel                                               | rat cerebral cortex       | [ <sup>125</sup> I]apamin                                  | 3                   |
| Na <sup>+</sup> channel (site 2)                                       | rat cerebral cortex       | [ <sup>3</sup> H]batrachotoxinin                           | 0                   |
| GABA <sub>A</sub> Cl <sup>-</sup> channel<br>(non- selective)          | rat cerebral cortex       | [ <sup>35</sup> S]TBPS                                     | -6                  |
| NMDA (PCP)                                                             | rat cerebral cortex       | [ <sup>3</sup> H]TCP                                       | 14                  |
| <b>Amine transporters</b>                                              |                           |                                                            |                     |
| Norepinephrine transporter                                             | hum. recomb. (CHO)        | [ <sup>3</sup> H]nisoxetine                                | 11                  |
| Dopamine transporter                                                   | hum. recomb. (CHO)        | [ <sup>3</sup> H]BTCP                                      | 19                  |
| Serotonin transporter                                                  | hum. recomb. (CHO)        | [ <sup>3</sup> H]imipramine                                | 5                   |
| <b>Nuclear receptor</b>                                                |                           |                                                            |                     |
| Glucocorticoid                                                         | hum., IM-9 cells, cytosol | [ <sup>3</sup> H]dexamethasone                             | -2                  |

**Table S3.** Summary of mean pharmacokinetic parameters of basmisanil following single intravenous dosing.

| Species, Strain (n)           | Dose (mg/kg) | Total CL (mL/min/kg) | V <sub>ss</sub> (L/kg) | t <sub>1/2</sub> (h) |
|-------------------------------|--------------|----------------------|------------------------|----------------------|
| Rat, Wistar (2 male)          | 4.3          | 54                   | 2.9                    | 1.2                  |
| Mouse, C57/Bl6 (2 male)       | 2.0          | 37                   | 1.3                    | 0.5                  |
| Dog, Beagle (n=3)             | 1.0          | 2.2 ± 0.2            | 1.7 ± 0.2              | 9.8 ± 0.8            |
| NHP, Cynomolgus macaque (n=3) | 1.0          | 3.0 ± 0.7            | 0.9 ± 0.6              | 4.5 ± 1.8            |

CL = clearance; V<sub>ss</sub> = volume of distribution at steady-state; t<sub>1/2</sub> = terminal half-life.

**Table S4.** Summary of the in vitro profile of GABA<sub>A</sub>-α5 NAMs

**a. Radioligand binding**

| Compound          | GABA <sub>A</sub> receptor subtype (K <sub>i</sub> nM) |        |        |        |                         | Reference |
|-------------------|--------------------------------------------------------|--------|--------|--------|-------------------------|-----------|
|                   | α1β3γ2                                                 | α2β3γ2 | α3β3γ2 | α5β3γ2 | α1/ α5 fold selectivity |           |
| <b>Basmisanil</b> | 1031                                                   | 458    | 510    | 5.1    | <b>202</b>              | 1)        |
| RO4938581         | 174                                                    | 185    | 80     | 4.6    | 38                      | 2)        |
| L-655,708         | 70                                                     | 48     | 31     | 1.0    | 70                      | 3)        |
| <b>α5IA</b>       | 0.9                                                    | 0.6    | 0.6    | 0.7    | 1                       | 4)        |
| <b>MRK-016</b>    | 0.8                                                    | 0.9    | 0.8    | 1.4    | 1                       | 5)        |
| PWZ-029           | 920                                                    | >300   | >300   | 30.0   | 31                      | 6)        |
| ONO-8290580       | 140                                                    | 32     | 24     | 7.9    | 18                      | 7)        |

**b. Electrophysiological measurements**

| Compound          | GABA <sub>A</sub> receptor subtype (% inhibition) |        |        |        |                   | References |
|-------------------|---------------------------------------------------|--------|--------|--------|-------------------|------------|
|                   | α1β3γ2                                            | α2β3γ2 | α3β3γ2 | α5β3γ2 | Expression system |            |
| <b>Basmisanil</b> | -5                                                | -7     | -1     | -39.4  | a)                | 1)         |
| RO4938581         | 5.8                                               | -9.9   | -2.7   | -43.3  | b)                | 2)         |
| L-655,708         | -18                                               | -23    | -11    | -17.0  | c)                | 3)         |
| <b>α5IA</b>       | -18.0                                             | 13.0   | -7.0   | -40.0  | c)                | 4)         |
| <b>MRK-016</b>    | -16.0                                             | 6.0    | -9.0   | -55.0  | c)                | 5)         |
| PWZ-029           | 14                                                | 5      | 18     | -20.0  | a)                | 6)         |
| ONO-8290580       | -3                                                | 5      | -5     | -44.4  | b)                | 7)         |

**References:** 1) This manuscript 2) Ballard et al., 2008 3) Atack et al., 2006 4) Dawson et al., 2006 5) Atack et al. 2009 6) Savić et al., 2008 7) Kawaharada et al., 2018

**Expression systems:** a) *Xenopus* oocytes b) HEK293 cells c) Mouse L(tk-) cells

**Table S5.** Basmisanil doses, plasma concentrations and regional receptor occupancy values in healthy human volunteer PET studies

| Subject ID | Dose (mg) | Time of dose (h prior to scan) | Basmisanil in plasma (ng/mL) at start of scan | Receptor occupancy (%) |              |                |                    |           |       |
|------------|-----------|--------------------------------|-----------------------------------------------|------------------------|--------------|----------------|--------------------|-----------|-------|
|            |           |                                |                                               | Amygdala               | Hippo campus | Insular cortex | Anterior cingulate | Accumbens | Mean  |
| 13040      | 20        | 1.48                           | 111                                           | 30.9                   | 26.8         | 26.7           | 26.2               | 29.6      | 28.04 |
| 13041      | 20        | 2.20                           | 398                                           | 34.7                   | 35.8         | 31.7           | 31.7               | 31.8      | 33.14 |
| 13010      | 40        | 2.63                           | 422                                           | 40                     | 41.3         | 32             | 32.7               | 37.3      | 36.66 |
| 11010      | 40        | 3.75                           | 592                                           | 53.5                   | 48.4         | 44.6           | 44.8               | 52.1      | 48.68 |
| 13050      | 80        | 2.43                           | 1000                                          | 63.5                   | 63           | 57.8           | 55.8               | 64.2      | 60.86 |
| 11020      | 160       | 3.12                           | 2280                                          | 91.4                   | 87.2         | 75.2           | 75.6               | 86.6      | 83.2  |
| 11021      | 160       | 3.00                           | 2550                                          | 85.4                   | 85.9         | 77.2           | 76.4               | 87.0      | 82.38 |
| 13030      | 1000      | 4.75                           | 2200                                          | 93.1                   | 94.2         | 79.9           | 79.1               | 89.5      | 87.16 |
| 13031      | 1000      | 4.77                           | 3350                                          | 97.4                   | 94.9         | 82.2           | 82.1               | 93.7      | 90.06 |

**Table S6. Summary of demographic characteristics of healthy volunteers in PET study**

| <b>Age (year)</b>                                  | <b>N = 9</b>   |
|----------------------------------------------------|----------------|
| Mean (SD)                                          | 25.3 (5.6)     |
| Median                                             | 23.0           |
| Min - Max                                          | 21 - 39        |
| <b>Sex</b>                                         |                |
| Male                                               | 7              |
| Female                                             | 2              |
| <b>Race</b>                                        |                |
| Asian                                              | 2              |
| Black or African American                          | 1              |
| White                                              | 6              |
| <b>Weight (kg)</b>                                 |                |
| Mean (SD)                                          | 78.58 (8.75)   |
| Median                                             | 77.80          |
| Min - Max                                          | 60.2 - 91.4    |
| <b>Height</b>                                      |                |
| Mean (SD)                                          | 173.67 (11.02) |
| Median                                             | 176.0          |
| Min - Max                                          | 153.0 - 187.0  |
| <b>Baseline Body Mass Index (kg/m<sup>2</sup>)</b> |                |
| Mean (SD)                                          | 26.47 (5.50)   |
| Median                                             | 24.87          |
| Min - Max                                          | 19.0 – 36.6    |

**Table S7. Summary of demographic characteristics of healthy volunteers in EEG study**

| <b>Age (year)</b>                                  | <b>N = 12</b> |
|----------------------------------------------------|---------------|
| Mean (SD)                                          | 42.6 (11.31)  |
| Median                                             | 47.0          |
| Min - Max                                          | 25 - 57       |
| <b>Sex</b>                                         |               |
| Male                                               | 9             |
| Female                                             | 3             |
| <b>Race</b>                                        |               |
| White                                              | 12            |
| Hispanic                                           | 0             |
| Non-hispanic                                       | 12            |
| <b>Weight (kg)</b>                                 |               |
| Mean (SD)                                          | 76.27 (10.96) |
| Median                                             | 75.40         |
| Min - Max                                          | 52.4 – 97.6   |
| <b>Height</b>                                      |               |
| Mean (SD)                                          | 175.5 (8.93)  |
| Median                                             | 175.0         |
| Min - Max                                          | 160.0 - 192.0 |
| <b>Baseline Body Mass Index (kg/m<sup>2</sup>)</b> |               |
| Mean (SD)                                          | 24.71 (2.70)  |
| Median                                             | 25.28         |
| Min - Max                                          | 20.47 – 29.14 |

## **CLINICAL INFORMATION: Safety EEG data from Phase I studies in healthy volunteers**

### **1) Study BP25129 Single-Ascending Dose (SAD) in Healthy Volunteers**

Single doses of between 1.5 mg and 1250 mg were administered to groups of eight healthy male subjects (age range 18–44 years) per dose level (6 received active drug, two received placebo). All nine planned cohorts in the Part 1 SAD study were completed, and all subjects completed dosing as planned.

Food Effect (FE) Cohort: Eight subjects were enrolled, all received active drug as planned on two separate occasions, with food condition (Fed or Fasted) on each occasion determined in a randomized manner. All subjects enrolled in the FE portion of Part 1 completed the study.

EEG assessments were made in Cohorts 6, 8, 9 and FE Cohort only:

- Cohort 6: 160 mg (n dosed: 6)
- Cohort 8: 660 mg (n dosed: 6)
- Cohort 9: 1250 mg (n dosed: 6)
- Food effect Cohort: 660 mg (n dosed: 6)

A screening assessment on admission was carried out to exclude subjects with nonspecific EEG patterns and facilitate the interpretation of post dosing EEG recordings. The duration of the entire recording was approximately 15–20 minutes. In addition to recording in the resting awake state, this assessment included reaction to intermittent photic stimulation and hyperventilation. The two latter methods were designed to evoke abnormal EEG waveforms or rhythms typically associated with epileptogenesis resulting from an underlying abnormality.

On the day of dosing, an EEG in the resting, awake state was recorded starting about 1 hour prior to dosing and ending approximately 7 h after dosing. EEG results were recorded either as normal, normal variant or abnormal variant. If an abnormal variant measurement was recorded, then the Investigator could continue recordings as appropriate until a return to normal was reached.

Review of the EEG data was performed in an unblinded manner by external experts and Roche internal experts who were independent of the study project team.

#### **Outcome:**

Basmisaniil was well tolerated. EEG assessments did not reveal any findings of clinical significance following single doses of 160 mg, 660 mg and 1250 mg with maximum plasma concentrations of 1860, 3710, and 4890 ng/mL.

### **2) Study WP25366 Multiple-Ascending Dose (MAD) in Healthy Volunteers**

Of the 32 healthy male subjects who were randomized to treatment, 24 subjects were assigned to active treatment with basmisaniil (6 subjects each received treatment with either basmisaniil 80, 160, 370, or 1000 mg BID) and 8 subjects were randomized to placebo. All participants had several EEGs and several participants had sleep assessments with EEG that were also evaluated:



- Cohort 1: 80 mg (n dosed: 6)
- Cohort 2: 160 mg (n dosed: 6)
- Cohort 3: 370 mg (n dosed: 6)
- Cohort 4: 1000 mg (n dosed: 6)

EEG monitoring was implemented in this study starting at about 1 hour prior to dosing and then up to approximately 7 hours after dosing, on selected days during the dosing period. All sleep recordings were performed for approximately 8 h from 23.00 to 07.00. The objective of such monitoring was detection if any, of specific EEG patterns such as spikes, sharp waves, and spike-and-wave discharges that would be indicative of epileptiform changes or non-convulsive seizure.

The day and night EEG recordings were subject to expert safety review, with the objective of identifying any pro-convulsive signals. Following this safety review, EEG results were recorded either as normal, normal variant or abnormal variant.

**Outcome:**

EEG assessments revealed no findings of clinical concern, specifically any signs indicative of epileptogenic effects (e.g., generalized spike-wave discharges) in any subject in any dose group at any time points during the study. The review of the day and night EEG recordings did not reveal any clinically significant finding especially no abnormalities which could indicate that basmisanil has proconvulsive property. In this study basmisanil, at 80 mg BID, 160 mg BID, 370 mg BID and 1000 mg BID, was safe and had no impact on brain electrical activity. Maximum plasma concentrations at Day 13 were 2120, 4110, 6040, and 8520 ng/mL respectively.

**3) Study WP29402 Drug-Drug Interaction (DDI) Itraconazole in Healthy Volunteers**

This was an open-label, three treatment, fixed sequence crossover study to investigate the effect of CYP3A inhibition (itraconazole) on basmisanil exposure, safety and tolerability in healthy male and female volunteers (age range 18-60 years; n: 12). As systemic basmisanil exposure was predicted to be higher than exposures achieved in previous clinical studies, regular EEG examinations were included and reviewed by a neurologist. Multiple oral doses of basmisanil (120 and 240 mg BID, 10 days) were administered alone and co-administered with the CYP3A inhibitor, itraconazole (200 mg OD).

Baseline EEG assessments were performed prior to the study (resting EEG eyes open/closed, intermittent photic stimulation, hyperventilation). On treatment days (1, 3, 5, 8) during co-administration of basmisanil and itraconazole, continuous EEG monitoring for 6 hours and resting EEG eyes open/closed were performed.

**Outcome:**

There was a 374% increase in systemic exposure at steady state (30700 ng/mL vs. 146000 ng/mL) and 312% increase in maximum plasma concentration (3510 ng/mL vs. 14500 ng/mL) at 240 mg of basmisanil. There were no epileptiform discharges, EEG seizure activity and non-epileptiform clinically relevant abnormalities when basmisanil was co-administered with itraconazole.
